# Supplementary material for: Upstream proteolysis by Ste24 does not require a C-terminal methyl ester as revealed using 33-residue a-factor precursor peptide substrates synthesized via epimerization-free methods
Source: Research Square preprint supplement (doi:10.21203/rs.3.rs-5094096/v1), 2024-11-29
Supplement: Supplementary file 1 [file 8fe2cf3baf17f818c716418f.pdf]

## Supplementary Information

**Upstream proteolysis by Ste24 does not require a C-terminal methyl ester as revealed using 33-residue a-factor precursor peptide substrates synthesized via epimerization-free methods**

Taysir Bader,<sup>1</sup> Shanica Brown,<sup>2</sup> Christine Hrycyna<sup>2,3</sup> and Mark D. Distefano<sup>1</sup>

<sup>1</sup>Department of Chemistry, University of Minnesota, Minneapolis, MN, USA

<sup>2</sup>Department of Chemistry, Purdue University, West Lafayette, IN, USA

<sup>3</sup>Department of Chemistry and Biochemistry, University of California, San Diego, San Diego, CA, USA

Correspondence

Christine Hrycyna, <sup>3</sup>Department of Chemistry and Biochemistry, University of California, San Diego, San Diego, CA, USA

Email: [chrycyna@ucsd.edu](mailto:chrycyna@ucsd.edu)

Mark D. Distefano, <sup>1</sup>Department of Chemistry, University of Minnesota, Minneapolis, MN, USA

Email: [diste001@umn.edu](mailto:diste001@umn.edu)

## Table of Contents

|                                                                                                                         |     |
|-------------------------------------------------------------------------------------------------------------------------|-----|
| <b>Fig. S1.</b> LC-MS chromatograms of crude 33mer peptides after resin cleavage and global deprotection. ....          | S3  |
| <b>Fig. S2.</b> Prenylation of peptide <b>1a</b> using Zn(OAc) <sub>2</sub> mediated reaction and farnesyl bromide..... | S4  |
| <b>Fig. S3.</b> Two-stage purification of peptide <b>1a</b> .....                                                       | S5  |
| <b>Fig. S4.</b> HPLC chromatogram of peptide <b>1a</b> after two-stage HPLC purification. ....                          | S5  |
| <b>Fig. S5.</b> Prenylation of peptide <b>2a</b> using Zn(OAc) <sub>2</sub> mediated reaction and farnesyl bromide..... | S6  |
| <b>Fig. S6.</b> Two-stage purification of peptide <b>2a</b> .....                                                       | S7  |
| <b>Fig. S7.</b> LC-MS chromatogram of peptide <b>2a</b> after two-stage HPLC purification. ....                         | S7  |
| <b>Fig. S8.</b> Prenylation of peptide <b>3a</b> using Zn(OAc) <sub>2</sub> mediated reaction and farnesyl bromide..... | S8  |
| <b>Fig. S9.</b> Two-stage purification of peptide <b>3a</b> .....                                                       | S9  |
| <b>Fig. S10.</b> LC-MS chromatogram of peptide <b>3a</b> after two-stage HPLC purification. ....                        | S9  |
| <b>Fig. S11.</b> Saponification reaction of peptide <b>1a</b> to obtain <b>2a</b> . ....                                | S10 |
| <b>Fig. S12.</b> LC-MS chromatogram of peptide <b>1a</b> after reaction with Ste24. ....                                | S11 |
| <b>Fig. S13.</b> LC-MS chromatogram of peptide <b>2a</b> after reaction with Ste24. ....                                | S12 |
| <b>Fig. S14.</b> LC-MS chromatogram of peptide <b>3a</b> after reaction with Ste24. ....                                | S13 |
| <b>Table S1.</b> Observed MS-MS fragments for peptide <b>1a</b> using ETD MS-MS analysis. ....                          | S14 |
| <b>Table S2.</b> Observed MS-MS fragments for peptide <b>2a</b> using ETD MS-MS analysis. ....                          | S15 |
| <b>Table S3.</b> Observed MS-MS fragments for peptide <b>3a</b> using ETD MS-MS analysis. ....                          | S16 |

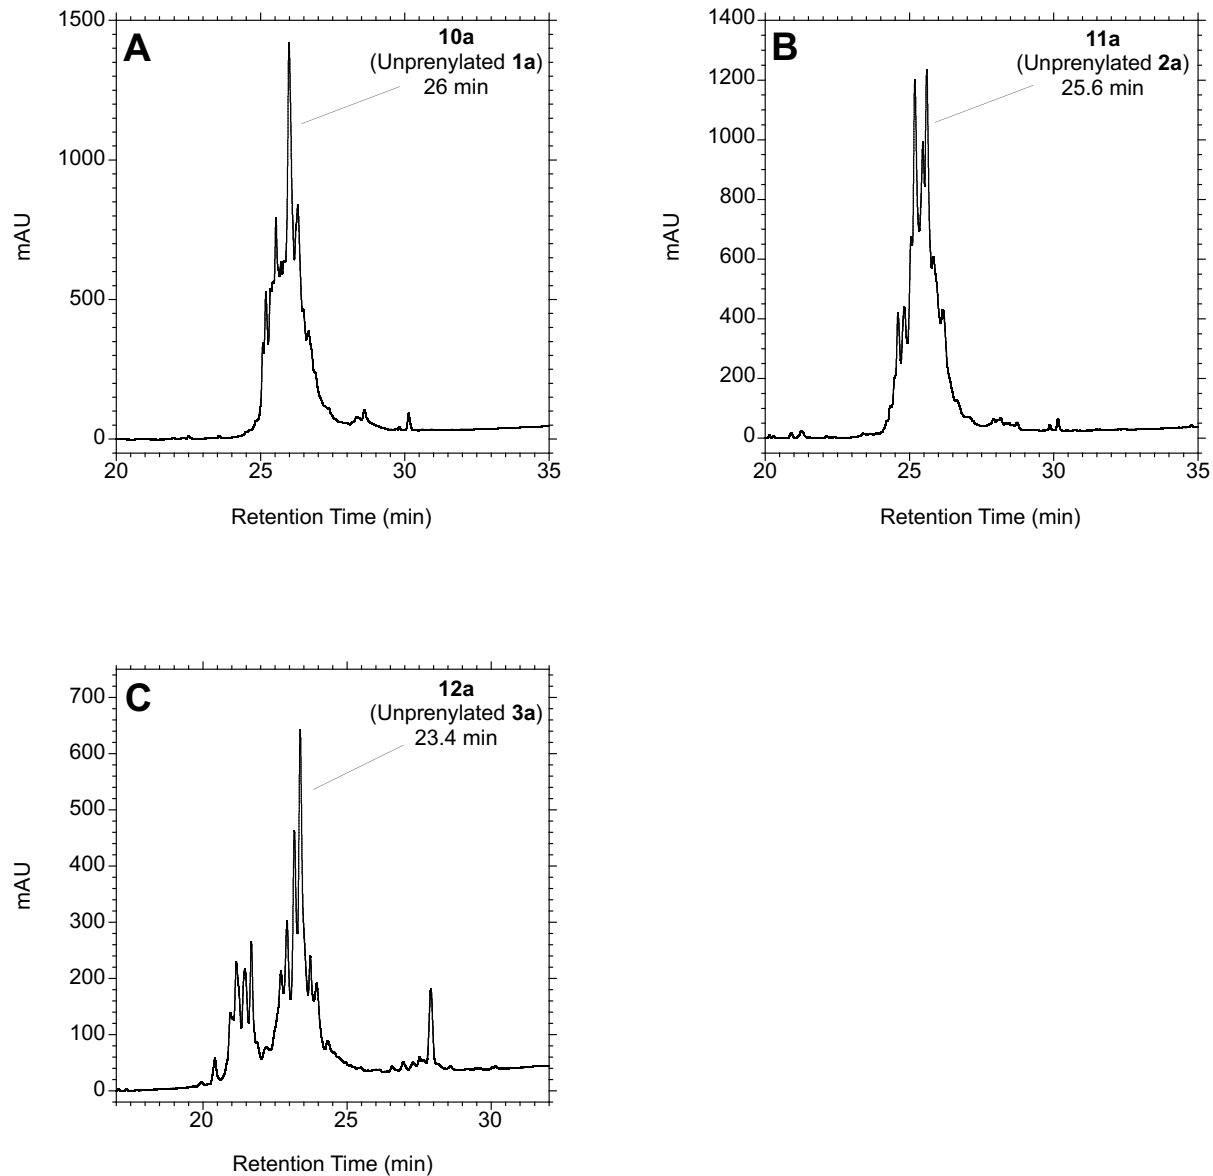

**Fig. S1.** LC-MS chromatograms of crude 33mer peptides after resin cleavage and global deprotection. LC-MS chromatograms highlighting the crude purity of the unprenylated precursors of the three 33mer analogues used in this study prior to prenylation. (A) C-terminal methyl ester peptide before farnesylation (**10a**). This peptide is the precursor in the synthesis of **1a**. (B) C-terminal carboxylic acid peptide before farnesylation (**11a**). This peptide is the precursor in the synthesis of **2a**. (C) C-terminal amide peptide before farnesylation (**12a**). This peptide is the precursor in the synthesis of **3a**. UV absorbance was monitored at 220 nm. The gradient used was as follows: 1-10 min, hold at 1% B. 10-35 min, gradient to 100% B. 35-40, hold at 100% B (column wash). 40-41, ramp to 1% B. 41-51, hold at 1% B (column equilibration).

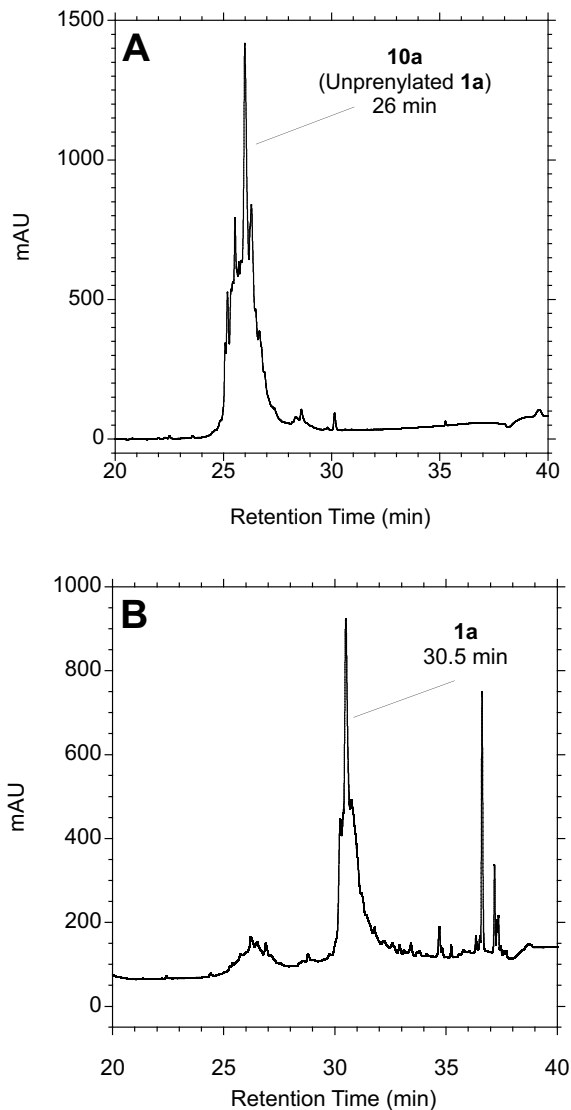

**Fig. S2.** Prenylation of peptide (**1a**) using  $\text{Zn}(\text{OAc})_2$  mediated reaction and farnesyl bromide.  $\text{Zn}(\text{OAc})_2$  coordinates with the thiol at pH 5.0, modulating its nucleophilicity to be able to react with farnesyl bromide and displace the halide. (A) Shows LC-MS chromatogram of the precursor to peptide (**1a**) with free thiol. (B) shows LC-MS chromatogram of the peptide after prenylation, affording peptide (**1a**). Characteristic retention time shift and MS confirmed the correct product. UV absorbance was monitored at 220 nm. The gradient used was as follows: The gradient used was as follows: 1-10 min, hold at 1% B. 10-35 min, gradient to 100% B. 35-40, hold at 100% B (column wash). 40-41, ramp to 1% B. 41-51, hold at 1% B (column equilibration). The increased hold time at the beginning of the method was essential to remove the DMF fully, enhancing the resolution.

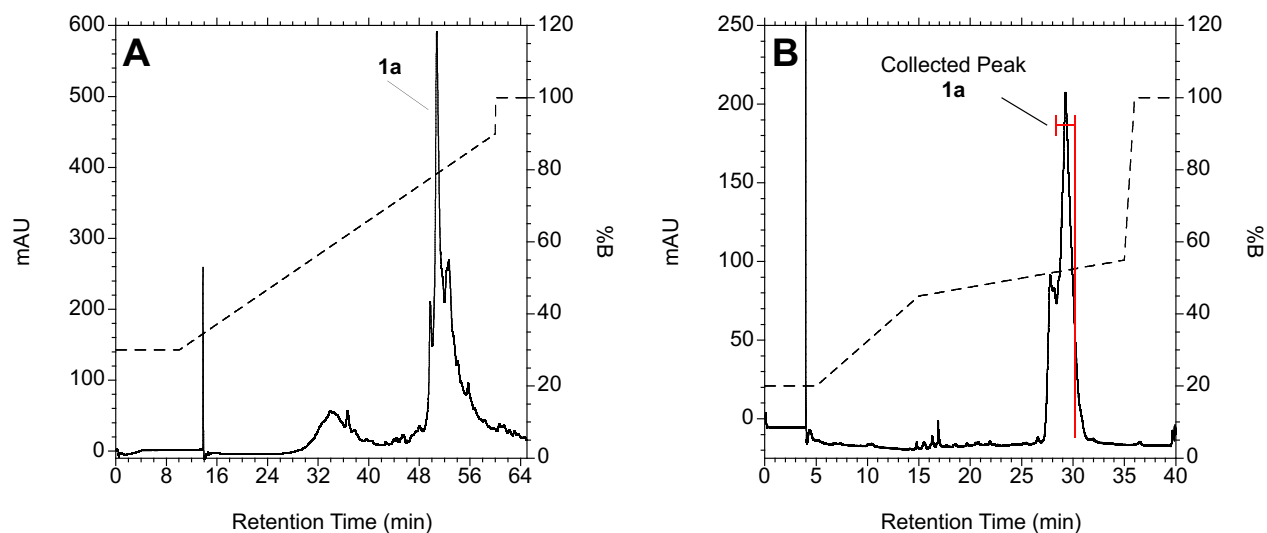

**Fig. S3.** Two-stage purification of peptide (**1a**). (**A**) Prep purification of peptide (**1a**). This initial stage helped concentrate the desired peptide. 73% purity was obtained afterwards. (**B**) Semi-prep purification using targeted gradient. This stage helped bring the purity to > 95%. This the shallow gradient helped improve the separation between closely eluting truncated peptide materials. UV absorbance was monitored at 280 nm, which helped improve the observed resolution.

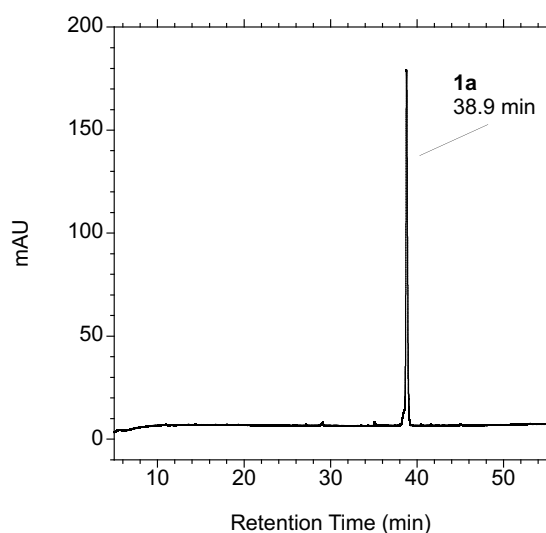

**Fig. S4.** HPLC chromatogram of peptide **1a** after two-stage HPLC purification. UV absorbance was monitored at 220 nm. The gradient was as follows: 1-5 min, hold at 1% B. 5-55 min, gradient to 100% B. 55-60, hold at 100% B (column wash). 60-61, ramp to 1% B. 61-71, hold at 1% B (column equilibration).

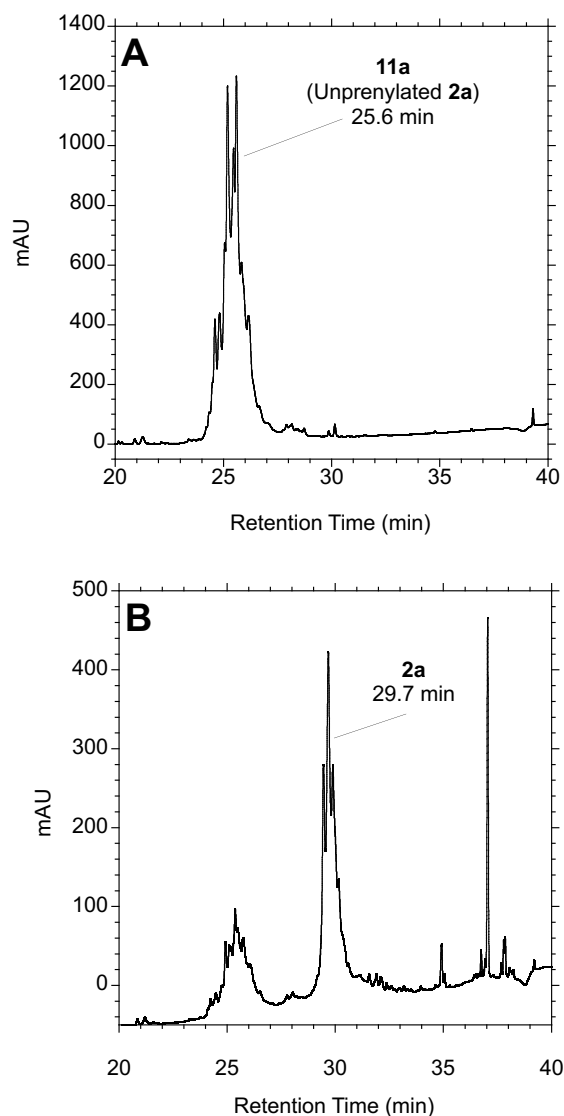

**Fig. S5.** Prenylation of peptide (**2a**) using  $\text{Zn}(\text{OAc})_2$  mediated reaction and farnesyl bromide.  $\text{Zn}(\text{OAc})_2$  coordinates with the thiol at pH 5.0, modulating its nucleophilicity to be able to react with farnesyl bromide and displace the halide. **(A)** Shows LC-MS chromatogram of the precursor to peptide (**2a**) with free thiol. **(B)** shows LC-MS chromatogram of the peptide after prenylation, affording peptide (**2a**). Characteristic retention time shift and MS confirmed the correct product. UV absorbance was monitored at 220 nm. The gradient used was as follows: The gradient used was as follows: 1-10 min, hold at 1% B. 10-35 min, gradient to 100% B. 35-40, hold at 100% B (column wash). 40-41, ramp to 1% B. 41-51, hold at 1% B (column equilibration). The increased hold time at the beginning of the method was essential to remove the DMF fully, enhancing the resolution.

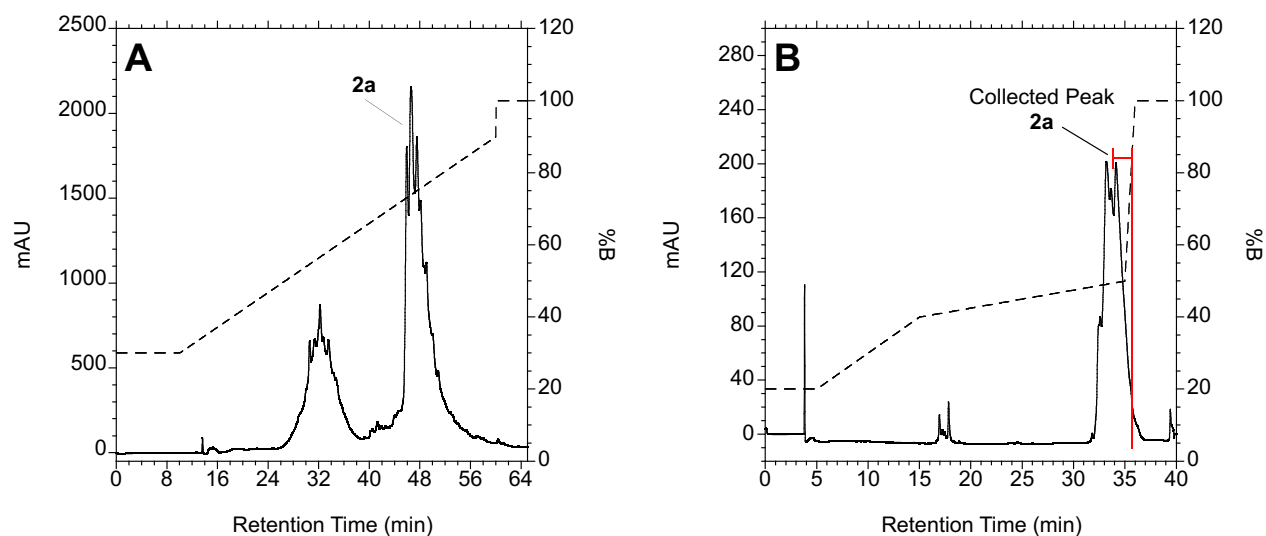

**Fig. S6.** Two-stage purification of peptide (**2a**). (**A**) Prep purification of peptide (**3a**). This initial stage helped concentrate the desired peptide. 73% purity was obtained afterwards. (**B**) Semi-prep purification using targeted gradient. This stage helped bring the purity to > 95%. This the shallow gradient helped improve the separation between closely eluting truncated peptide materials. UV absorbance was monitored at 280 nm, which helped improve the observed resolution.

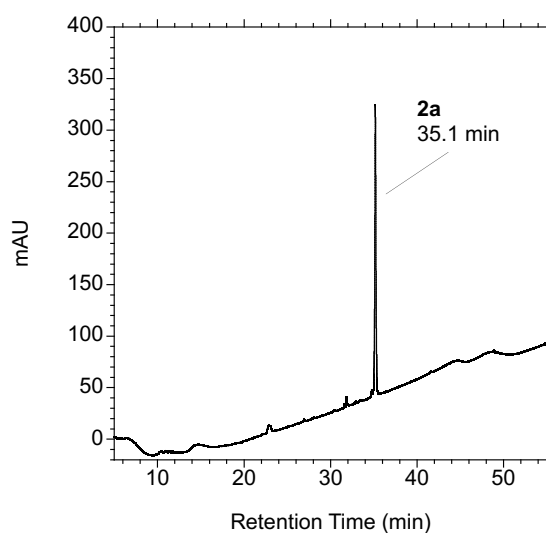

**Fig. S7.** LC-MS chromatogram of peptide **2a** after two-stage HPLC purification. UV absorbance was monitored at 220 nm. The gradient was as follows: 1-5 min, hold at 1% B. 5-55 min, gradient to 100% B. 55-60, hold at 100% B (column wash). 60-61, ramp to 1% B. 61-71, hold at 1% B (column equilibration).

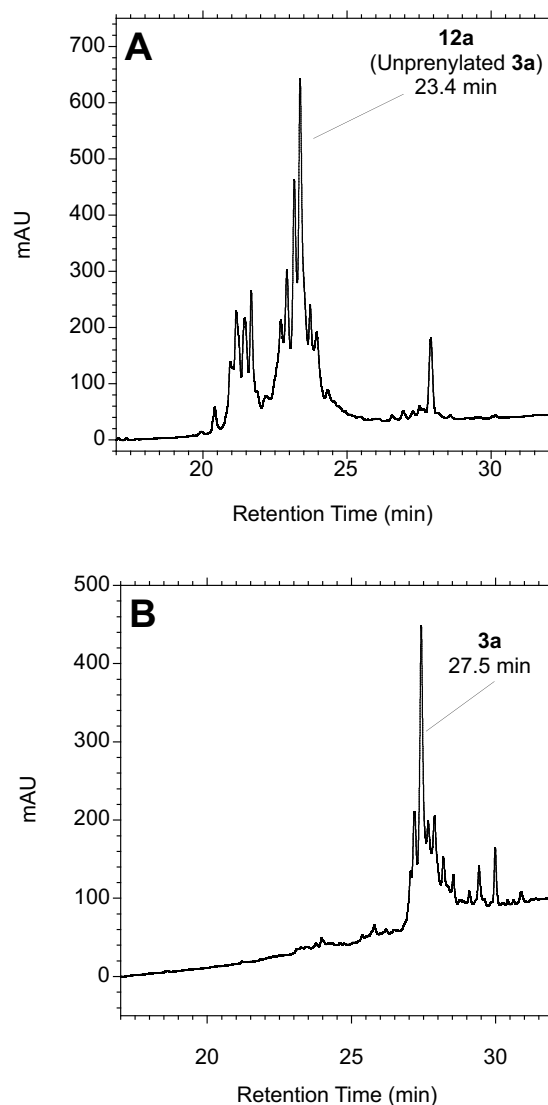

**Fig. S8.** Prenylation of peptide (**3a**) using  $\text{Zn}(\text{OAc})_2$  mediated reaction and farnesyl bromide.  $\text{Zn}(\text{OAc})_2$  coordinates with the thiol at pH 5.0, modulating its nucleophilicity to be able to react with farnesyl bromide and displace the halide. **(A)** Shows LC-MS chromatogram of the precursor to peptide (**3a**) with free thiol. **(B)** shows LC-MS chromatogram of the peptide after prenylation, affording peptide (**3a**). Characteristic retention time shift and MS confirmed the correct product. UV absorbance was monitored at 220 nm. The gradient used was as follows: 1-10 min, hold at 1% B. 10-35 min, gradient to 100% B. 35-40, hold at 100% B (column wash). 40-41, ramp to 1% B. 41-51, hold at 1% B (column equilibration). The increased hold time at the beginning of the method was essential to remove the DMF fully, enhancing the resolution.



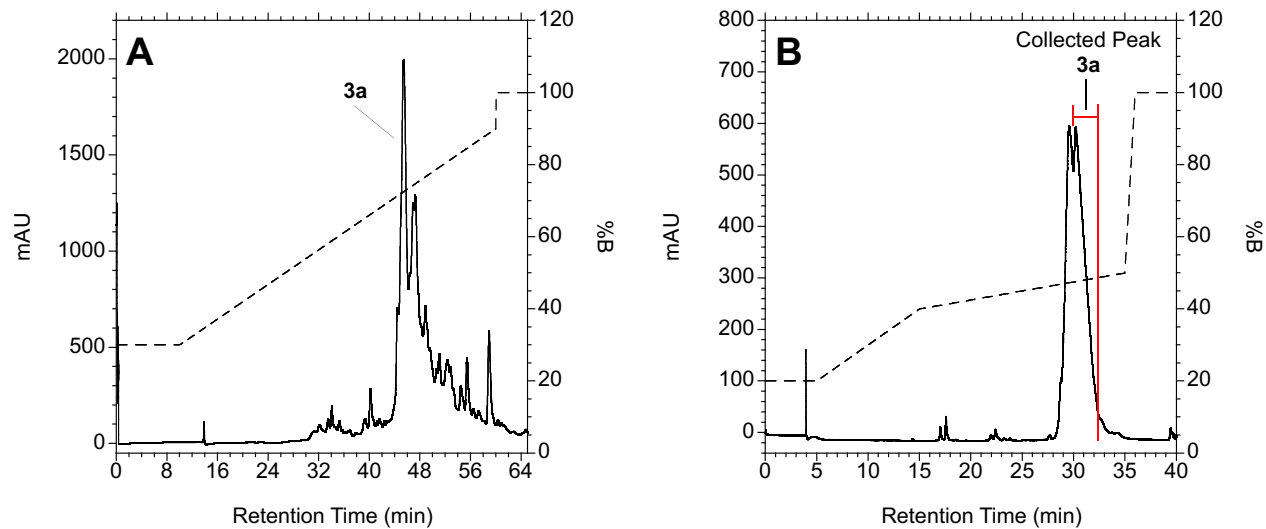

**Fig. S9.** Two-stage purification of peptide (**3a**). (**A**) Prep purification of peptide (**3a**). This initial stage helped concentrate the desired peptide. 75% purity was obtained afterwards. (**B**) Semi-prep purification using targeted gradient. This stage helped bring the purity to > 95%. This the shallow gradient helped improve the separation between closely eluting truncated peptide materials. UV absorbance was monitored at 280 nm, which helped improve the observed resolution.

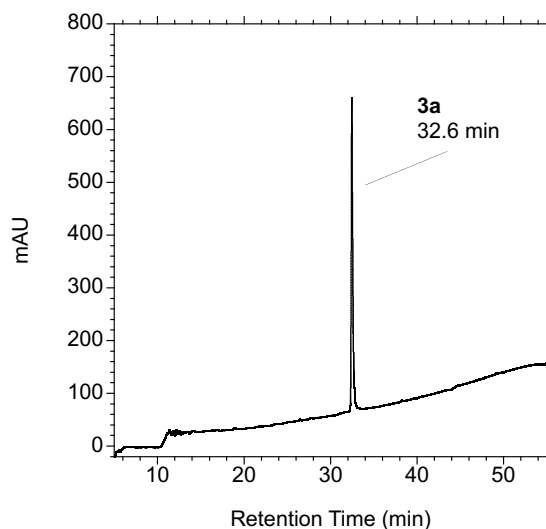

**Fig. S10.** LC-MS chromatogram of peptide **3a** after two-stage HPLC purification. UV absorbance was monitored at 220 nm. The gradient was as follows: 1-5 min, hold at 1% B. 5-55 min, gradient to 100% B. 55-60, hold at 100% B (column wash). 60-61, ramp to 1% B. 61-71, hold at 1% B (column equilibration).

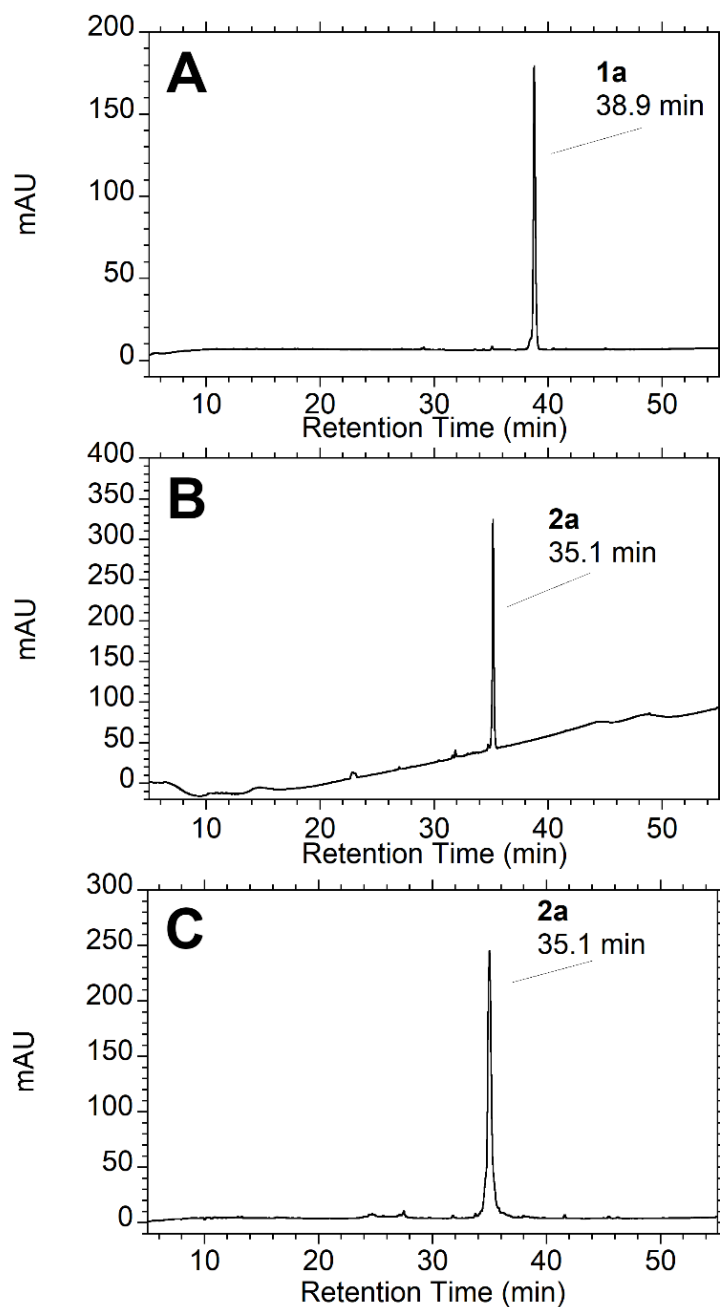

**Fig. S11.** Saponification reaction of peptide **1a** to obtain **2a**. In light of the significant amount of epimerization observed when producing the C-terminal cysteine containing peptide **2a**, and the minimal amount observed when producing the methyl ester analogue **1a**, a simple saponification reaction with NaOH was used to hydrolyze the methyl ester and convert it to the corresponding carboxylic acid with no epimerization within 1 h. Glacial acetic acid was then used to quench the reaction and prevent any base-mediated epimerization. (A) shows the LC-MS chromatogram of peptide **1a** before the reaction. (B) shows the LC-MS chromatogram of purified peptide **2a**. (C) shows the LC-MS chromatogram of **1a** after the saponification reaction. Both RT and observed mass correspond to the peptide **2a**. UV absorbance was monitored at 220 nm. The gradient used was as follows: 1-5 min, hold at 1% B. 5-55 min, gradient to 100% B. 55-60, hold at 100% B (column wash). 60-61, ramp to 1% B. 61-71, hold at 1% B (column equilibration).

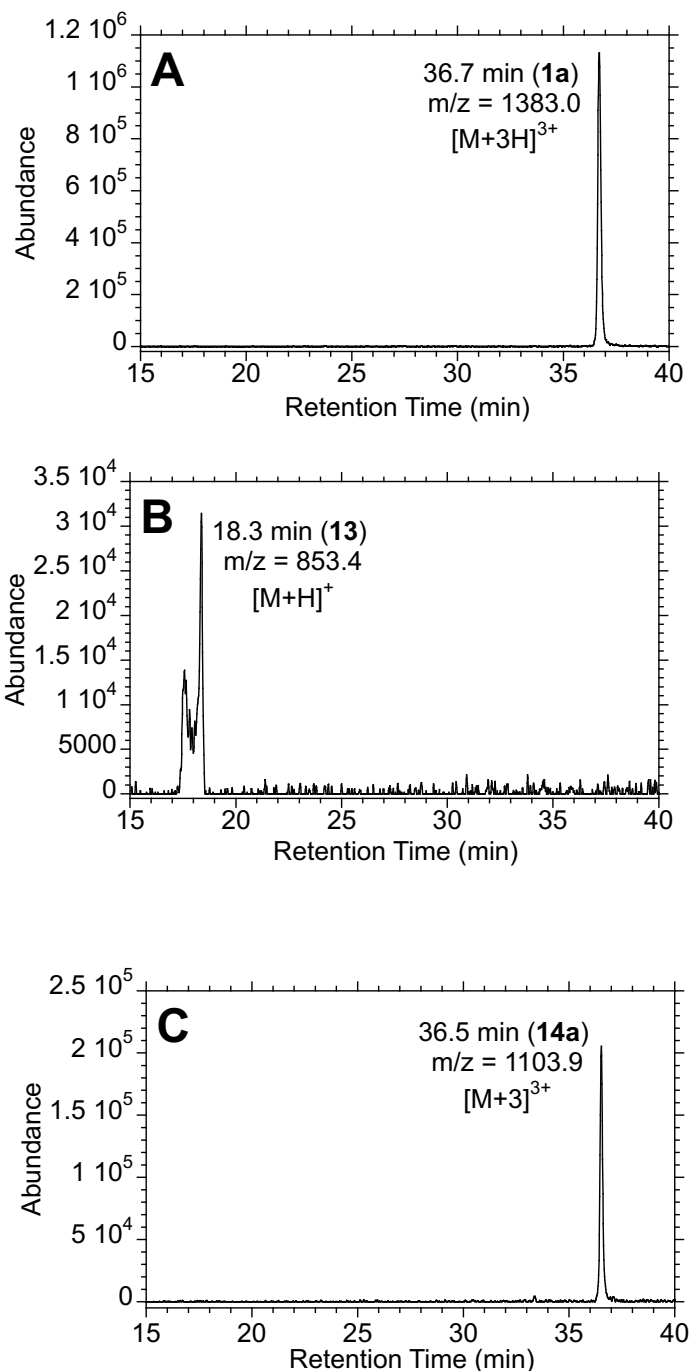

**Fig. S12.** LC-MS chromatogram of peptide **1a** after reaction with Ste24. Chromatogram shows extracted ions for peptide **3a** (Panel A) as well as the two cleavage products (**13**, Panel B) and (**14a** Panel C) obtained after reacting with Ste24. The gradient was as follows: 1-5 min, hold at 1% B. 5-55 min, gradient to 100% B. 55-60, hold at 100% B (column wash). 60-61, ramp to 1% B. 61-71, hold at 1% B (column equilibration).

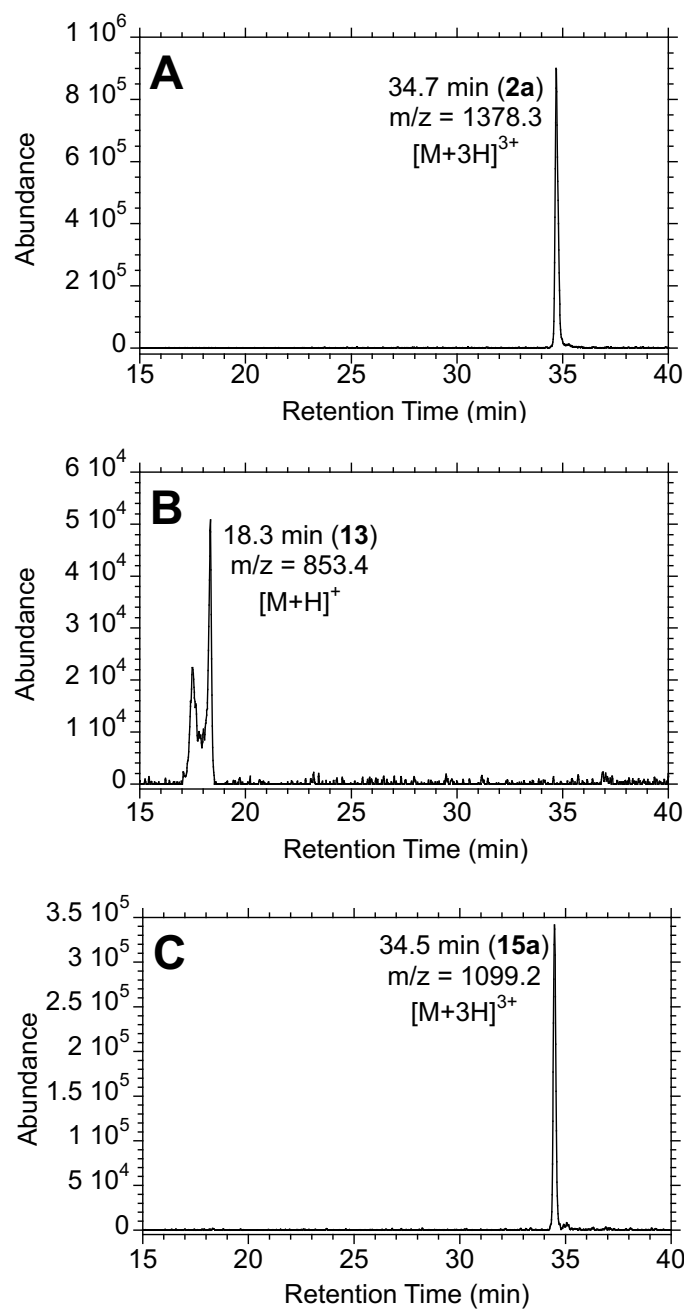

**Fig. S13.** LC-MS chromatogram of peptide **2a** after reaction with Ste24. Chromatogram shows extracted ions for peptide **2a** (Panel A) as well as the two cleavage products (**13**, Panel B) and (**15a**, Panel C) obtained after reacting with Ste24. The gradient was as follows: 1-5 min, hold at 1% B. 5-55 min, gradient to 100% B. 55-60, hold at 100% B (column wash). 60-61, ramp to 1% B. 61-71, hold at 1% B (column equilibration).

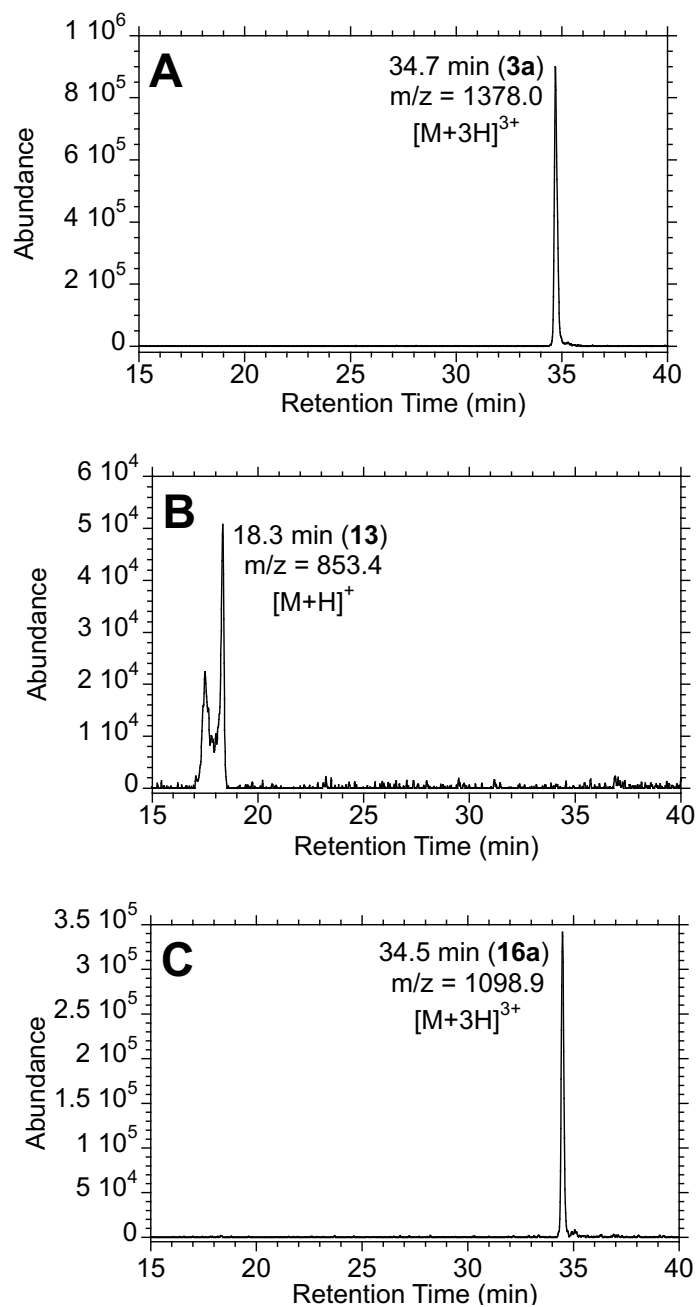

**Fig. S14.** LC-MS chromatogram of peptide **3a** after reaction with Ste24. Chromatogram shows extracted ions for peptide **3a** (Panel A) as well as the two cleavage products (**13**, Panel B) and (**16a**, Panel C) obtained after reacting with Ste24. The gradient was as follows: 1-5 min, hold at 1% B. 5-55 min, gradient to 100% B. 55-60, hold at 100% B (column wash). 60-61, ramp to 1% B. 61-71, hold at 1% B (column equilibration).

**Table S1.** Observed MS-MS fragments for peptide **1a** using ETD MS-MS analysis.

| Fragment | Charge | Calculated m/z | Found m/z | Fragment | Charge | Calculated m/z | Found m/z |
|----------|--------|----------------|-----------|----------|--------|----------------|-----------|
| x33      | 3      | 1351.6667      | 1351.6469 | c33      | 3      | 1275.2871      | 1275.2817 |
| z32      | 3      | 1293.6512      | 1293.6636 | c32      | 3      | 1251.6080      | 1256.6365 |
| z31      | 3      | 1251.6369      | 1251.6285 | c31      | 3      | 1219.2571      | 1219.5892 |
| z30      | 3      | 1218.6141      | 1218.9320 | c30      | 3      | 1180.9148      | 1180.9123 |
| z29      | 3      | 1189.6034      | 1189.5773 | c29      | 3      | 1118.8883      | 1118.8800 |
| z28      | 3      | 1155.9209      | 1155.9145 | c28      | 3      | 1069.8655      | 1069.8551 |
| z27      | 3      | 1132.2418      | 1132.2164 | c27      | 3      | 1036.8427      | 1036.8409 |
| x26      | 3      | 1112.8945      | 1112.5811 | b26      | 3      | 1017.1601      | 1012.4920 |
| z25      | 2      | 1611.8167      | 1611.7800 | c25      | 3      | 975.1373       | 975.1588  |
| z24      | 2      | 1584.8114      | 1584.8103 | c24      | 3      | 937.4426       | 937.8064  |
| z23      | 3      | 1018.8503      | 1018.8635 | c23      | 3      | 899.7479       | 899.4418  |
| z22      | 3      | 920.8181       | 920.4513  | c22      | 3      | 845.3934       | 845.3934  |
| z21      | 3      | 892.1392       | 892.4178  | c21      | 3      | 807.3791       | 807.3916  |
| z20      | 3      | 835.1056       | 835.1660  | c20      | 2      | 1144.5383      | 1144.2338 |
| z19      | 2      | 1201.6310      | 1201.5565 | c19      | 2      | 1088.5024      | 1088.5235 |
| z18      | 2      | 1158.1150      | 1158.5679 | c18      | 2      | 1024.4549      | 1024.5090 |
| z17      | 2      | 1114.5989      | 1114.5592 | c17      | 3      | 640.2915       | 640.2961  |
| z16      | 2      | 1050.0776      | 1050.1871 | c16      | 2      | 907.9043       | 907.9564  |
| z15      | 2      | 986.0302       | 986.2214  | c15      | 3      | 582.2702       | 582.2886  |
| z14      | 2      | 943.4855       | 943.4625  | c14      | 2      | 799.8670       | 799.8987  |
| z13      | 2      | 863.9675       | 863.6716  | c13      | 2      | 735.8195       | 735.3139  |
| z12      | 2      | 806.9461       | 806.6434  | c12      | 2      | 693.8090       | 693.3177  |
| z11      | 2      | 725.4143       | 725.3608  | c11      | 1      | 1092.5144      | 1092.5599 |
| z10      | 1      | 1353.7640      | 1353.7672 | c10      | 1      | 978.4349       | 978.4332  |
| z9       | 1      | 1223.6534      | 1223.9624 | c9       | 1      | 924.4244       | 924.4443  |
| z8       | 1      | 1112.5850      | 1112.5812 | c8       | 1      | 836.3608       | 836.3578  |
| z7       | 1      | 1038.5369      | 1038.4952 | c7       | 1      | 761.3396       | 761.3874  |
| z6       | 2      | 470.2379       | 470.2047  | c6       | 2      | 341.1550       | 341.2342  |
| z5       | 2      | 396.7037       | 396.1880  | c5       | 1      | 563.2283       | 563.2313  |
| z4       | 1      | 606.3206       | 606.2656  | c4       | 2      | 247.1150       | 247.1150  |

|    |   |          |          |    |   |          |          |
|----|---|----------|----------|----|---|----------|----------|
| z3 | 1 | 493.3094 | 493.2411 | c3 | 2 | 198.5887 | 198.1238 |
| z2 | 1 | 411.2675 | 411.2724 | c2 | 1 | 268.1114 | 268.1297 |
| z1 | 1 | 323.2040 | 323.2017 | c1 | 1 | 137.0708 | 137.0708 |

**Table S2.** Observed MS-MS fragments for peptide **2a** using ETD MS-MS analysis.

| Fragment | Charge | Calculated m/z | Found m/z    | Fragment | Charge | Calculated m/z | Found m/z    |
|----------|--------|----------------|--------------|----------|--------|----------------|--------------|
| z33      | 3      | 1332.6595      | 1332.6552    | 33       |        |                | Not Observed |
| z32      | 3      | 1288.9793      | 1288.9802    | c32      | 3      | 1251.6080      | 1251.6304    |
| z31      | 3      | 1246.9650      | 1246.6320    | c31      | 3      | 1219.2571      | 1219.6144    |
| z30      | 2      | 1820.4097      | 1820.3731    | c30      | 3      | 1180.9148      | 1180.9124    |
| z29      | 3      | 1184.9315      | 1184.9051    | c29      | 3      | 1118.8883      | 1118.8619    |
| z28      | 3      | 1151.2490      | 1151.5435    | c28      | 3      | 1069.8655      | 1069.5129    |
| z27      | 2      | 1690.8512      | 1690.3446    | b27      | 3      | 1031.1672      | 1031.1693    |
| y26      | 3      | 1099.5629      | 1099.5432    | b26      | 2      | 1517.7365      | 1517.7223    |
| z25      | 3      | 1070.2083      | 1070.5002    | c25      | 3      | 975.1373       | 975.1600     |
| z24      | 2      | 1569.2903      | 1569.2776    | c24      | 3      | 937.4426       | 937.4934     |
| z23      | 3      | 1014.1784      | 1014.5152    | c23      | 3      | 899.7479       | 899.3314     |
| z22      | 3      | 916.1462       | 916.1950     | c22      | 3      | 839.7179       | 839.9102     |
| z21      | 3      | 887.4673       | 887.4362     | c21      | 3      | 807.3791       | 807.4041     |
| z20      | 2      | 1245.1469      | 1245.6198    | b20      | 2      | 1144.5383      | 1144.5688    |
| z19      |        |                | Not Observed | c19      | 2      | 1088.5024      | 1088.5303    |
| z18      | 2      | 1151.1071      | 1151.2599    | c18      | 2      | 1024.4549      | 1024.5078    |
| z17      | 2      | 1107.5911      | 1107.5679    | c17      | 2      | 959.9336       | 959.5426     |
| z16      | 2      | 1043.0698      | 1043.1793    | c16      | 2      | 916.4176       | 916.4473     |
| y15      | 2      | 987.5356       | 987.5142     | c15      | 2      | 872.9017       | 872.7761     |
| z14      | 3      | 609.9845       | 609.3318     | a14      | 1      | 1598.7268      | 1598.7678    |
| y13      | 1      | 1729.9386      | 1729.9228    | a13      | 1      | 1470.6319      | 1470.7355    |
| z12      | 1      | 1598.8691      | 1598.7678    | c12      |        |                | Not Observed |
| z11      | 2      | 718.4065       | 718.3020     | c11      | 1      | 1092.5144      | 1092.5540    |

|     |   |           |           |     |   |          |          |
|-----|---|-----------|-----------|-----|---|----------|----------|
| z10 | 3 | 441.5788  | 441.2156  | b10 | 1 | 978.4350 | 978.4345 |
| z9  | 1 | 1209.6377 | 1209.5897 | b9  | 1 | 907.3979 | 907.3953 |
| z8  | 1 | 1081.5428 | 1081.5272 | c8  | 1 | 853.3874 | 853.4198 |
| z7  | 1 | 1024.5212 | 1024.5081 | c7  | 1 | 761.3396 | 761.3654 |
| y6  | 1 | 942.4794  | 942.4792  | b6  | 1 | 664.2760 | 664.2719 |
| y5  | 1 | 795.4110  | 795.4091  | b5  | 1 | 563.2283 | 564.2758 |
| z4  | 1 | 592.3049  | 592.2218  | c4  | 1 | 493.2227 | 493.2413 |
| y3  | 1 | 494.3048  | 494.3051  | c3  | 1 | 396.1700 | 396.1877 |
| z2  | 1 | 380.2253  | 380.1505  | c2  | 1 | 268.1114 | 268.1289 |
| y1  | 1 | 326.2149  | 326.2131  | c1  | 1 | 137.0708 | 137.1320 |

**Table S3.** Observed MS-MS fragments for peptide **3a** using ETD MS-MS analysis.

| Fragment | Charge | Calculated m/z | Found m/z | Fragment | Charge | Calculated m/z | Found m/z |
|----------|--------|----------------|-----------|----------|--------|----------------|-----------|
| z33      | 3      | 1332.3315      | 1332.1702 | b33      | 3      | 1269.6115      | 1269.6300 |
| z32      | 3      | 1288.6513      | 1288.6543 | c32      | 3      | 1251.6080      | 1251.6386 |
| z31      | 3      | 1246.6370      | 1246.6324 | c31      | 3      | 1219.2571      | 1219.3054 |
| z30      | 3      | 1213.6142      | 1213.6151 | c30      | 3      | 1180.9148      | 1180.9154 |
| z29      | 3      | 1184.6035      | 1184.5802 | c29      | 3      | 1118.8883      | 1118.8682 |
| z28      | 3      | 1150.9210      | 1150.8749 | c28      | 2      | 1604.2946      | 1604.3367 |
| z27      | 2      | 1690.3592      | 1690.3324 | b27      | 3      | 1031.1672      | 1031.1912 |
| y26      | 3      | 1099.2349      | 1099.5608 | c26      | 3      | 1017.8356      | 1017.5219 |
| z25      | 2      | 1604.3168      | 1604.3367 | c25      | 3      | 975.1373       | 975.1573  |
| z24      | 2      | 1568.7983      | 1568.7910 | c24      | 2      | 1397.1469      | 1397.6271 |
| z22      | 3      | 915.8182       | 915.7011  | c23      | 3      | 899.7479       | 899.4703  |
| z21      | 3      | 887.1393       | 887.4221  | b22      | 3      | 839.7179       | 839.9160  |
| x20      | 3      | 844.4410       | 846.4503  | c21      | 3      | 807.3791       | 807.4004  |
| x19      | 3      | 810.7584       | 810.9002  | b20      | 2      | 1144.5383      | 1144.5738 |
| z18      | 2      | 1150.6151      | 1150.5683 | c19      | 2      | 1088.5024      | 1088.5258 |
| z17      | 2      | 1107.0991      | 1107.0703 | c18      | 2      | 1024.4549      | 1024.5184 |
| z16      | 2      | 1042.5778      | 1042.8577 | c17      | 3      | 640.2915       | 646.2666  |
| z15      | 2      | 978.5303       | 978.4321  | c16      | 2      | 916.4176       | 916.4459  |



|     |   |           |           |     |   |           |              |
|-----|---|-----------|-----------|-----|---|-----------|--------------|
| x14 | 2 | 935.9857  | 935.8061  | c14 | 2 | 822.3778  | 1822.3585    |
| z13 | 2 | 856.4677  | 856.6807  | a13 | 2 | 735.8196  | 735.3171     |
| z12 | 1 | 1597.8851 | 1597.7700 | 12  |   |           | Not Observed |
| y11 | 1 | 1451.8484 | 1451.7880 | b11 | 1 | 1075.4878 | 1075.5293    |
| z10 | 1 | 1321.7378 | 1321.6433 | b10 | 1 | 978.4350  | 978.4321     |
| z9  | 1 | 1208.6537 | 1208.5967 | c9  | 1 | 924.4244  | 924.4667     |
| z8  | 1 | 1080.5588 | 1081.5489 | c8  | 1 | 853.3874  | 853.6814     |
| z7  | 1 | 1023.5372 | 1023.5142 | b7  | 1 | 735.3131  | 735.3171     |
| z6  | 1 | 924.4688  | 941.4904  | b6  | 1 | 664.2760  | 664.2754     |
| z5  | 1 | 777.4004  | 777.3747  | b5  | 1 | 563.2283  | 563.3242     |
| z4  | 1 | 591.3209  | 591.3246  | c4  | 1 | 493.2227  | 493.3217     |
| z3  | 1 | 478.3097  | 478.1025  | c3  | 1 | 396.1700  | 396.1892     |
| z2  | 1 | 379.2413  | 379.1461  | c2  | 1 | 268.1114  | 268.1291     |
| z1  | 1 | 322.2200  | 322.1765  | c1  | 1 | 137.0708  | 137.1320     |
